# Supplementary material for: Prediction of Functional Loss of Human Angiogenin Mutants Associated with ALS by Molecular Dynamics Simulations
Source: PubMed Central journal article supplement — Sci Rep. 2013 Feb 7;3:1225. doi: 10.1038/srep01225 (PMC3566597; doi:10.1038/srep01225), 2013-02-07
Supplement: srep01225-s1.pdf [file srep01225-s1.pdf]

## Supplementary Information

### **Prediction of Functional Loss of Human Angiogenin Mutants Associated with ALS by Molecular Dynamics Simulations**

**Aditya K. Padhi<sup>1</sup>, Bhyravabhotla Jayaram<sup>1,2,3</sup>, James Gomes<sup>1\*</sup>**

<sup>1</sup> Kusuma School of Biological Sciences

<sup>2</sup> Department of Chemistry

<sup>3</sup> Supercomputing Facility for Bioinformatics and Computational Biology  
Indian Institute of Technology Delhi  
Hauz Khas, New Delhi - 110016, India

#### **\* Correspondence**

Kusuma School of Biological Sciences  
Block 1A, Room No. 307  
Indian Institute of Technology Delhi  
Hauz Khas, New Delhi - 110016, India  
Email: [jgomes@bioschool.iitd.ac.in](mailto:jgomes@bioschool.iitd.ac.in)

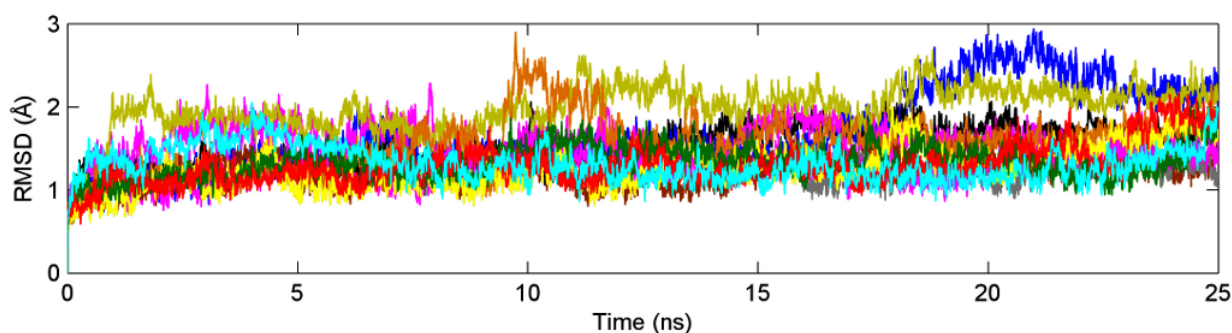

**Supplementary Figure S1. Computed RMSD profiles of ALS associated ANG mutants.**

Computed RMSD values for all the ANG mutants representing their stability during the simulation run are plotted. The root mean square deviation (RMSD) values of the backbone atoms were computed from the equilibrated conformation. RMSD values for angiogenin mutants are represented in the following colour lines (WT-ANG: black, I46V: blue, K17E: light pink, R31K: brown, D22G: gray, N49S: magenta, T80S: light green, V103I: orange, K54E: yellow, F100I: green, R121C: red and R121H: cyan).

**Supplementary Table S1.** Computed hydrogen bonding occupancy between Thr44-Thr80 and Asp116-Ser118 from MD simulations for the ANG mutants.

| ANG    | H-bonding occupancy (%) |                 |
|--------|-------------------------|-----------------|
|        | Thr44 – Thr80           | Asp116 – Ser118 |
| WT-ANG | 50.11                   | 57.61           |
| I46V   | 81.45                   | 80.78           |
| K17E   | 76.71                   | 71.23           |
| R31K   | 48.60                   | 46.27           |
| D22G   | 89.59                   | 90.12           |
| N49S   | 52.50                   | 63.23           |
| T80S   | 82.89                   | 87.22           |
| V103I  | 41.55                   | 48.72           |
| K54E   | 46.60                   | 54.05           |
| F100I  | 48.50                   | 47.94           |
| R121C  | 55.52                   | 51.06           |
| R121H  | 53.59                   | 44.14           |

**Supplementary Table S2.** Computed binding free energy scores for ANG mutants and NCI-65828 complexes using ParDOCK.

| ANG     | ParDOCK binding energy scores |                             |
|---------|-------------------------------|-----------------------------|
|         | Native His114 conformation    | Altered His114 conformation |
| WT-ANG* | -4.96 kcal/mol                |                             |
| I46V    | -3.99 kcal/mol                | -2.94 kcal/mol              |
| K17E    | -3.58 kcal/mol                | -2.61 kcal/mol              |
| R31K    | -3.10 kcal/mol                | -1.86 kcal/mol              |
| D22G    | -3.36 kcal/mol                | -2.47 kcal/mol              |
| N49S    | -3.98 kcal/mol                | -2.05 kcal/mol              |
| T80S    | -4.15 kcal/mol                | -1.93 kcal/mol              |
| V103I*  | -4.01 kcal/mol                |                             |
| K54E*   | -3.91 kcal/mol                |                             |
| F100I*  | -4.11 kcal/mol                |                             |
| R121C*  | -4.00 kcal/mol                |                             |
| R121H*  | -3.89 kcal/mol                |                             |

\*ANG mutants which do not exhibit characteristic conformational change of the catalytic residue His114.
